# Supplementary material for: The Food and Nutrition Environment at Secondary Schools in the Eastern Cape, South Africa as Reported by Learners
Source: MDPI journal article supplement (doi:10.3390/ijerph17114038), 2020-06-05
Supplement: s1 [file s1]

**Supplementary Table 1: NUTRITION KNOWLEDGE TEST**

(Please tick the correct answer)

1. The key to healthy eating is to:

|     |                                                             |   |
|-----|-------------------------------------------------------------|---|
| a)  | Eat many different kinds of food                            | 1 |
| b). | Eat some food more than other food                          | 2 |
| c). | Eat certain kinds of food in moderation or in small amounts | 3 |
| d). | All the answers are correct                                 | 4 |

2. The following food items should not be eaten at all when one is trying to lose weight

|     |                                 |   |
|-----|---------------------------------|---|
| a). | Bread and rice                  | 1 |
| b). | Meat and fish                   | 2 |
| c). | Margarine                       | 3 |
| d). | None of the answers are correct | 4 |
| e). | I do not know                   | 5 |

3. From the list of groups of food below, which food items contain a lot of fibre?

|     |                       |   |
|-----|-----------------------|---|
| a). | Oats, apples, beans   | 1 |
| b). | Milk, yoghurt, cheese | 2 |
| c). | Beef, chicken, mutton | 3 |
| d). | Butter, margarine     | 4 |

|    |                                                                                     |         |          |               |
|----|-------------------------------------------------------------------------------------|---------|----------|---------------|
| 4. | Eating different kinds of foods is healthier than eating only a few kinds of foods. | 1. True | 2. False | 3. Don't know |
|----|-------------------------------------------------------------------------------------|---------|----------|---------------|

|    |                                                                                                                                    |         |          |               |
|----|------------------------------------------------------------------------------------------------------------------------------------|---------|----------|---------------|
| 5. | It is impossible to get all the vitamins and minerals you need from food, hence you need to take vitamins and mineral supplements. | 1. True | 2. False | 3. Don't know |
|----|------------------------------------------------------------------------------------------------------------------------------------|---------|----------|---------------|

|    |                                                                                          |         |          |               |
|----|------------------------------------------------------------------------------------------|---------|----------|---------------|
| 6. | To protect yourself from diseases, you should avoid eating many different kinds of food. | 1. True | 2. False | 3. Don't know |
|----|------------------------------------------------------------------------------------------|---------|----------|---------------|

|    |                                                            |         |          |               |
|----|------------------------------------------------------------|---------|----------|---------------|
| 7. | People who are overweight should not be physically active. | 1. True | 2. False | 3. Don't know |
|----|------------------------------------------------------------|---------|----------|---------------|

|    |                                                                                     |        |          |               |
|----|-------------------------------------------------------------------------------------|--------|----------|---------------|
| 8. | If you are eating a healthy diet, there is no need for you to be physically active. | 1.True | 2. False | 3. Don't know |
|----|-------------------------------------------------------------------------------------|--------|----------|---------------|

|    |                                                                                                    |         |          |               |  |
|----|----------------------------------------------------------------------------------------------------|---------|----------|---------------|--|
| 9. | If you want to lose weight, there is no need to be physically active, it is better to simply diet. | 1. True | 2. False | 3. Don't know |  |
|----|----------------------------------------------------------------------------------------------------|---------|----------|---------------|--|

10. You should not have starches at most meals because

|     |                                                 |   |
|-----|-------------------------------------------------|---|
| a). | They are not important for your health          | 1 |
| b). | Even eating small amounts can cause weight gain | 2 |
| c). | They cause diseases                             | 3 |
| d). | None of the above answers are correct           | 4 |
| e). | I do not know                                   | 5 |

11. From which group of food items should you eat the most every day?

|     |                                   |   |
|-----|-----------------------------------|---|
| a). | Bread, samp, rice, porridge       | 1 |
| b). | Apples, bananas, spinach, carrots | 2 |
| c). | Milk, yoghurt, cheese             | 3 |
| d). | Chicken, fish, beans, eggs        | 4 |
| e). | Do not know                       | 5 |

12. An example of a well balance diet consists of:

|     |                                                                                        |   |
|-----|----------------------------------------------------------------------------------------|---|
| a). | Mostly meat with smaller amounts of starch, fruits, vegetables and dairy products      | 1 |
| b). | Mostly vegetables and smaller amounts of meat and dairy products                       | 2 |
| c). | Mostly starches, vegetables and fruits with smaller amounts of meat and dairy products | 3 |
| d). | None of the above are correct                                                          | 4 |

13. Which food has the most fibre?

|     |                                                                     |      |       |
|-----|---------------------------------------------------------------------|------|-------|
| a). | White rolls                                                         | 1    |       |
| b). | Brown bread                                                         | 2    |       |
| c). | White bread                                                         | 3    |       |
| d). | Whole wheat bread                                                   | 4    |       |
| 14. | Starch foods should not be eaten when one is trying to lose weight. | True | False |

|     |                                              |      |       |
|-----|----------------------------------------------|------|-------|
| 15. | Eating bread is associated with weight gain. | True | False |
|-----|----------------------------------------------|------|-------|

|     |                                                                      |      |       |
|-----|----------------------------------------------------------------------|------|-------|
| 16. | It is usually not necessary to wash vegetables before you cook them. | True | False |
|-----|----------------------------------------------------------------------|------|-------|

17. Which one of the foods listed would you eat the most if you were trying to increase fibre in your diet?

|     |                        |   |
|-----|------------------------|---|
| a). | Cakes and biscuits     | 1 |
| b). | Apples and carrots     | 2 |
| c). | Chips and pies         | 3 |
| d). | Chicken and fresh fish | 4 |

18. How many servings of fruits and vegetables should be eaten per day?

|     |                                                     |   |
|-----|-----------------------------------------------------|---|
| a). | One fruit and vegetable daily                       | 1 |
| b). | 3-4 fruits and vegetables daily                     | 2 |
| c). | 5 or more fruits and vegetables daily               | 3 |
| d). | There is no need to eat fruits and vegetables daily | 4 |

19. Which nutrients are found in large amounts in fruits and vegetables?

|     |                              |   |
|-----|------------------------------|---|
| a). | Fibre and vitamin A          | 1 |
| b). | Starches, fats and vitamin D | 2 |
| c). | Fats Iron and calcium        | 3 |
| d). | None of the above            | 4 |

20. Which one of the foods listed would you eat the most if you were trying to increase fibre in your diet?

|     |                        |   |
|-----|------------------------|---|
| a). | Cakes and biscuits     | 1 |
| b). | Apples and carrots     | 2 |
| c). | Chips and pies         | 3 |
| d). | Chicken and fresh fish | 4 |

|     |                                                   |         |          |                 |
|-----|---------------------------------------------------|---------|----------|-----------------|
| 21. | Dry beans, peas and lentils should be eaten often | 1. True | 2. False | 3. I don't Know |
|-----|---------------------------------------------------|---------|----------|-----------------|

|     |                                  |         |          |                 |
|-----|----------------------------------|---------|----------|-----------------|
| 22. | Soya mince is as healthy as meat | 1. True | 2. False | 3. I don't Know |
|-----|----------------------------------|---------|----------|-----------------|

|     |                                                                       |            |             |                    |
|-----|-----------------------------------------------------------------------|------------|-------------|--------------------|
| 23. | Dry beans, peas, lentils are a healthy choice to eat in place of meat | 1.<br>True | 2.<br>False | 3. I don't<br>Know |
|-----|-----------------------------------------------------------------------|------------|-------------|--------------------|

24. Cooked meat/fish/chicken sold on the street may not be safe to eat because

|     |                                                           |   |
|-----|-----------------------------------------------------------|---|
| 1). | It may have been undercooked                              | 1 |
| 2). | The cook may not have used fresh meat                     | 2 |
| 3). | It may have been kept for a long time before being cooked | 3 |
| 4). | All of the above are correct                              | 4 |

25. Which one of the food groups listed contains a lot of calcium?

|     |                     |   |
|-----|---------------------|---|
| 1). | Chicken and eggs    | 1 |
| 2). | milk, yoghurt       | 2 |
| 3). | Pilchards           | 3 |
| 4). | 2 and 3 are correct | 4 |

26. How much milk or 'maas' should you have a day?

|     |                                                          |         |    |               |   |
|-----|----------------------------------------------------------|---------|----|---------------|---|
| 1). | None                                                     |         |    |               | 1 |
| 2). | Half a cup                                               |         |    |               | 2 |
| 3). | One cup                                                  |         |    |               | 3 |
| 4). | Two cups                                                 |         |    |               | 4 |
| 27. | It is healthy to use only a little salt when cooking the | 1. True | 2. | 3. Don't know |   |

28. Which of the following food items has iodine been added?

|     |               |   |
|-----|---------------|---|
| 1). | Bread         | 1 |
| 2). | Maize meal    | 2 |
| 3). | Table salt    | 3 |
| 4). | Powdered milk | 4 |

28. Which of the following snacks is low in fat?

|     |             |   |
|-----|-------------|---|
| 1). | Simba chips | 1 |
| 2). | Popcorn     | 2 |
| 3). | Fried chips | 3 |
| 4). | Nicknacks   | 4 |
|     |             |   |

30. Which breakfast menu contains little fat

|     |                                                |   |
|-----|------------------------------------------------|---|
| 1). | Whole wheat toast with thinly spread margarine | 1 |
| 2). | Weet-bix with 2% fat milk                      | 2 |
| 3). | Bacon and eggs                                 | 3 |
| 4). | One and two are correct                        | 4 |

|     |                                                 |         |          |               |
|-----|-------------------------------------------------|---------|----------|---------------|
| 31. | It is healthy to use a lot of oil when cooking? | 1. True | 2. False | 3. Don't know |
|-----|-------------------------------------------------|---------|----------|---------------|

32. How much water should you drink a day?

|     |                                          |   |
|-----|------------------------------------------|---|
| 1). | You do not have to drink water every day | 1 |
| 2). | One to three glasses a day               | 2 |
| 3). | 4 to 6 glasses a day                     | 3 |
| 4). | 7 to 9 glasses a day                     | 4 |
| 5). | I do not know                            | 5 |

|     |                                                                       |         |          |               |
|-----|-----------------------------------------------------------------------|---------|----------|---------------|
| 33. | You should add extra salt to your cooked food before you even eat it. | 1. True | 2. False | 3. Don't know |
|-----|-----------------------------------------------------------------------|---------|----------|---------------|

|     |                                     |         |          |               |
|-----|-------------------------------------|---------|----------|---------------|
| 34. | Any type of water is safe to drink. | 1. True | 2. False | 3. Don't know |
|-----|-------------------------------------|---------|----------|---------------|

|     |                                                            |         |          |               |
|-----|------------------------------------------------------------|---------|----------|---------------|
| 35. | Drinking a lot of wine, beer, cider can cause weight gain. | 1. True | 2. False | 3. Don't know |
|-----|------------------------------------------------------------|---------|----------|---------------|

|     |                                                      |         |          |               |
|-----|------------------------------------------------------|---------|----------|---------------|
| 36. | You should eat a lot of sugar to have enough energy. | 1. True | 2. False | 3. Don't know |
|-----|------------------------------------------------------|---------|----------|---------------|

|     |                                                                                                            |         |          |  |
|-----|------------------------------------------------------------------------------------------------------------|---------|----------|--|
| 37. | What a pregnant woman eats during pregnancy has no effect on her health and the health of her unborn baby. | 1. True | 2. False |  |
|-----|------------------------------------------------------------------------------------------------------------|---------|----------|--|

|     |                                                                    |         |          |               |
|-----|--------------------------------------------------------------------|---------|----------|---------------|
| 38. | Sugar and foods containing sugar should be eaten in small amounts. | 1. True | 2. False | 3. Don't know |
|-----|--------------------------------------------------------------------|---------|----------|---------------|

|     |                                                                |         |          |               |
|-----|----------------------------------------------------------------|---------|----------|---------------|
| 39. | Sugar contains a lot of vitamins and minerals.                 | 1. True | 2. False | 3. Don't know |
| 40. | It is unhealthy to snack on food that contains a lot of sugar. | 1. True | 2. False | 3. Don't know |

Condensed from: Whati, L.H.; Senekal, M.; Steyn, N.P.; Nel, J.H.; Lombard, C.; Norris, S. Development of a reliable and valid nutrition questionnaire for urban South African adolescents. *Nutrition* **2005**, 21, 76-85.

### **Supplementary Table 2.** The South African Food-Based Dietary Guidelines (FBDGs)

- Enjoy a variety of foods
- Be active
- Make starchy foods part of most meals
- Eat plenty of vegetables and fruits every day
- Eat dry beans, peas, lentils and soya regularly
- Have milk, *maas* (sour milk) or yoghurt every day
- Chicken, fish, lean meat, or eggs can be eaten daily
- Drink lots of safe, clean water
- Use fats sparingly; choose vegetable oils rather than hard fats
- Use sugar and food and drinks high in sugar sparingly
- Use salt and foods high in salt sparingly

Vorster, H.H.; Badham, J.B.; Venter, C.S. An introduction to the revised food- based dietary guidelines for South Africa. *S. Afr. J. Clin Nutr*, **2013**, 3, S5-S12.







|     |                      |   |
|-----|----------------------|---|
| 4). | 7 to 9 glasses a day | 4 |
| 5). | I do not know        | 5 |

|     |                                                                       |         |          |               |
|-----|-----------------------------------------------------------------------|---------|----------|---------------|
| 33. | You should add extra salt to your cooked food before you even eat it. | 1. True | 2. False | 3. Don't know |
|-----|-----------------------------------------------------------------------|---------|----------|---------------|

|     |                                     |         |          |               |  |
|-----|-------------------------------------|---------|----------|---------------|--|
| 34. | Any type of water is safe to drink. | 1. True | 2. False | 3. Don't know |  |
|-----|-------------------------------------|---------|----------|---------------|--|

|     |                                                            |         |          |               |  |
|-----|------------------------------------------------------------|---------|----------|---------------|--|
| 35. | Drinking a lot of wine, beer, cider can cause weight gain. | 1. True | 2. False | 3. Don't know |  |
|-----|------------------------------------------------------------|---------|----------|---------------|--|

|     |                                                                                                            |         |          |               |  |
|-----|------------------------------------------------------------------------------------------------------------|---------|----------|---------------|--|
| 36. | You should eat a lot of sugar to have enough energy.                                                       | 1. True | 2. False | 3. Don't know |  |
| 37. | What a pregnant woman eats during pregnancy has no effect on her health and the health of her unborn baby. | 1. True | 2. False | 3. Don't know |  |

|     |                                                                    |         |          |               |  |
|-----|--------------------------------------------------------------------|---------|----------|---------------|--|
| 38. | Sugar and foods containing sugar should be eaten in small Amounts. | 1. True | 2. False | 3. Don't know |  |
|-----|--------------------------------------------------------------------|---------|----------|---------------|--|

|     |                                                |         |          |               |  |
|-----|------------------------------------------------|---------|----------|---------------|--|
| 39. | Sugar contains a lot of vitamins and minerals. | 1. True | 2. False | 3. Don't know |  |
|-----|------------------------------------------------|---------|----------|---------------|--|

|     |                                                                |         |          |               |  |
|-----|----------------------------------------------------------------|---------|----------|---------------|--|
| 40. | It is unhealthy to snack on food that contains a lot of sugar. | 1. True | 2. False | 3. Don't know |  |
|-----|----------------------------------------------------------------|---------|----------|---------------|--|



|     |                      |   |  |
|-----|----------------------|---|--|
| c). | Pies, cakes puddings | 3 |  |
| d). | None of the above    | 4 |  |

|     |                                                   |         |          |                 |
|-----|---------------------------------------------------|---------|----------|-----------------|
| 21. | Dry beans, peas and lentils should be eaten often | 1. True | 2. False | 3. I don't Know |
|-----|---------------------------------------------------|---------|----------|-----------------|

|     |                                  |         |          |                 |
|-----|----------------------------------|---------|----------|-----------------|
| 22. | Soya mince is as healthy as meat | 1. True | 2. False | 3. I don't Know |
|-----|----------------------------------|---------|----------|-----------------|

|     |                                                                       |         |          |                 |
|-----|-----------------------------------------------------------------------|---------|----------|-----------------|
| 23. | Dry beans, peas, lentils are a healthy choice to eat in place of meat | 1. True | 2. False | 3. I don't Know |
|-----|-----------------------------------------------------------------------|---------|----------|-----------------|

27. Cooked meat/fish/chicken sold on the street may not be safe to eat because

|     |                                                           |   |  |
|-----|-----------------------------------------------------------|---|--|
| 1). | It may have been undercooked                              | 1 |  |
| 2). | The cook may not have used fresh meat                     | 2 |  |
| 3). | It may have been kept for a long time before being cooked | 3 |  |
| 4). | All of the above are correct                              | 4 |  |

28. Which one of the food groups listed contains a lot of calcium?

|     |                     |   |
|-----|---------------------|---|
| 1). | Chicken and eggs    | 1 |
| 2). | milk, yoghurt       | 2 |
| 3). | Pilchards           | 3 |
| 4). | 2 and 3 are correct | 4 |

29. How much milk or 'maas' should you have a day?

|     |            |   |  |
|-----|------------|---|--|
| 1). | None       | 1 |  |
| 2). | Half a cup | 2 |  |
| 3). | One cup    | 3 |  |
| 4). | Two cups   | 4 |  |

28. Which of the following food items has iodine been added?

|     |               |   |  |
|-----|---------------|---|--|
| 1). | Bread         | 1 |  |
| 2). | Maize meal    | 2 |  |
| 3). | Table salt    | 3 |  |
| 4). | Powdered milk | 4 |  |

29. Which of the following snacks is low in fat?

|     |             |   |  |
|-----|-------------|---|--|
| 1). | Simba chips | 1 |  |
| 2). | Popcorn     | 2 |  |
| 3). | Fried chips | 3 |  |
| 4). | Nicknacks   | 4 |  |

30. Which of the following breakfast menu contains little fat?

|     |                                                |   |
|-----|------------------------------------------------|---|
| 1). | Whole wheat toast with thinly spread margarine | 1 |
| 2). | Weet-bix with 2% fat milk                      | 2 |
| 3). | Bacon and eggs                                 | 3 |
| 4). | One and two are correct                        | 4 |

|     |                                                 |         |          |               |  |
|-----|-------------------------------------------------|---------|----------|---------------|--|
| 31. | It is healthy to use a lot of oil when cooking? | 1. True | 2. False | 3. Don't know |  |
|-----|-------------------------------------------------|---------|----------|---------------|--|

32. How much water should you drink a day?

|     |                                          |   |
|-----|------------------------------------------|---|
| 1). | You do not have to drink water every day | 1 |
| 2). | One to three glasses a day               | 2 |
| 3). | 4 to 6 glasses a day                     | 3 |
| 4). | 7 to 9 glasses a day                     | 4 |
| 5). | I do not know                            | 5 |

|     |                                                                       |         |          |               |  |
|-----|-----------------------------------------------------------------------|---------|----------|---------------|--|
| 33. | You should add extra salt to your cooked food before you even eat it. | 1. True | 2. False | 3. Don't know |  |
|-----|-----------------------------------------------------------------------|---------|----------|---------------|--|

|     |                                     |         |          |               |  |
|-----|-------------------------------------|---------|----------|---------------|--|
| 34. | Any type of water is safe to drink. | 1. True | 2. False | 3. Don't know |  |
|-----|-------------------------------------|---------|----------|---------------|--|

|     |                                                            |         |          |               |  |
|-----|------------------------------------------------------------|---------|----------|---------------|--|
| 35. | Drinking a lot of wine, beer, cider can cause weight gain. | 1. True | 2. False | 3. Don't know |  |
|-----|------------------------------------------------------------|---------|----------|---------------|--|

|     |                                                                                                            |         |          |               |  |
|-----|------------------------------------------------------------------------------------------------------------|---------|----------|---------------|--|
| 36. | You should eat a lot of sugar to have enough energy.                                                       | 1. True | 2. False | 3. Don't know |  |
| 37. | What a pregnant woman eats during pregnancy has no effect on her health and the health of her unborn baby. | 1. True | 2. False | 3. Don't know |  |

|     |                                                                    |         |          |               |  |
|-----|--------------------------------------------------------------------|---------|----------|---------------|--|
| 38. | Sugar and foods containing sugar should be eaten in small Amounts. | 1. True | 2. False | 3. Don't know |  |
|-----|--------------------------------------------------------------------|---------|----------|---------------|--|

|     |                                                |         |          |               |  |
|-----|------------------------------------------------|---------|----------|---------------|--|
| 39. | Sugar contains a lot of vitamins and minerals. | 1. True | 2. False | 3. Don't know |  |
|-----|------------------------------------------------|---------|----------|---------------|--|

|     |                                                                |         |          |               |  |
|-----|----------------------------------------------------------------|---------|----------|---------------|--|
| 40. | It is unhealthy to snack on food that contains a lot of sugar. | 1. True | 2. False | 3. Don't know |  |
|-----|----------------------------------------------------------------|---------|----------|---------------|--|





31. Which of the following food items has iodine been added?

|     |               |   |  |
|-----|---------------|---|--|
| 1). | Bread         | 1 |  |
| 2). | Maize meal    | 2 |  |
| 3). | Table salt    | 3 |  |
| 4). | Powdered milk | 4 |  |

32. Which of the following snacks is low in fat?

|     |             |   |  |
|-----|-------------|---|--|
| 1). | Simba chips | 1 |  |
| 2). | Popcorn     | 2 |  |
| 3). | Fried chips | 3 |  |
| 4). | Nicknacks   | 4 |  |

33. Which of the following breakfast menu contains little fat?

|     |                                                |   |  |
|-----|------------------------------------------------|---|--|
| 1). | Whole wheat toast with thinly spread margarine | 1 |  |
| 2). | Weet-bix with 2% fat milk                      | 2 |  |
| 3). | Bacon and eggs                                 | 3 |  |
| 4). | One and two are correct                        | 4 |  |

|     |                                                 |         |          |               |  |
|-----|-------------------------------------------------|---------|----------|---------------|--|
| 31. | It is healthy to use a lot of oil when cooking? | 1. True | 2. False | 3. Don't know |  |
|-----|-------------------------------------------------|---------|----------|---------------|--|

32. How much water should you drink a day?

|     |                                          |   |  |
|-----|------------------------------------------|---|--|
| 1). | You do not have to drink water every day | 1 |  |
| 2). | One to three glasses a day               | 2 |  |
| 3). | 4 to 6 glasses a day                     | 3 |  |



|     |                      |   |
|-----|----------------------|---|
| 4). | 7 to 9 glasses a day | 4 |
| 5). | I do not know        | 5 |

|     |                                                                       |         |          |               |
|-----|-----------------------------------------------------------------------|---------|----------|---------------|
| 33. | You should add extra salt to your cooked food before you even eat it. | 1. True | 2. False | 3. Don't know |
|-----|-----------------------------------------------------------------------|---------|----------|---------------|

|     |                                     |         |          |               |  |
|-----|-------------------------------------|---------|----------|---------------|--|
| 34. | Any type of water is safe to drink. | 1. True | 2. False | 3. Don't know |  |
|-----|-------------------------------------|---------|----------|---------------|--|

|     |                                                            |         |          |               |  |
|-----|------------------------------------------------------------|---------|----------|---------------|--|
| 35. | Drinking a lot of wine, beer, cider can cause weight gain. | 1. True | 2. False | 3. Don't know |  |
|-----|------------------------------------------------------------|---------|----------|---------------|--|

|     |                                                                                                            |         |          |               |  |
|-----|------------------------------------------------------------------------------------------------------------|---------|----------|---------------|--|
| 36. | You should eat a lot of sugar to have enough energy.                                                       | 1. True | 2. False | 3. Don't know |  |
| 37. | What a pregnant woman eats during pregnancy has no effect on her health and the health of her unborn baby. | 1. True | 2. False | 3. Don't know |  |

|     |                                                                    |         |          |               |  |
|-----|--------------------------------------------------------------------|---------|----------|---------------|--|
| 38. | Sugar and foods containing sugar should be eaten in small Amounts. | 1. True | 2. False | 3. Don't know |  |
|-----|--------------------------------------------------------------------|---------|----------|---------------|--|

|     |                                                |         |          |               |  |
|-----|------------------------------------------------|---------|----------|---------------|--|
| 39. | Sugar contains a lot of vitamins and minerals. | 1. True | 2. False | 3. Don't know |  |
|-----|------------------------------------------------|---------|----------|---------------|--|

|     |                                                                |         |          |               |  |
|-----|----------------------------------------------------------------|---------|----------|---------------|--|
| 40. | It is unhealthy to snack on food that contains a lot of sugar. | 1. True | 2. False | 3. Don't know |  |
|-----|----------------------------------------------------------------|---------|----------|---------------|--|
